# Supplementary material
Source: Springer Nature journal article supplement (https://www.springermedizin.de/resource/supplementary/12894_2012_223_MOESM5_ESM.pdf/9513238)

**5%(n=2)**

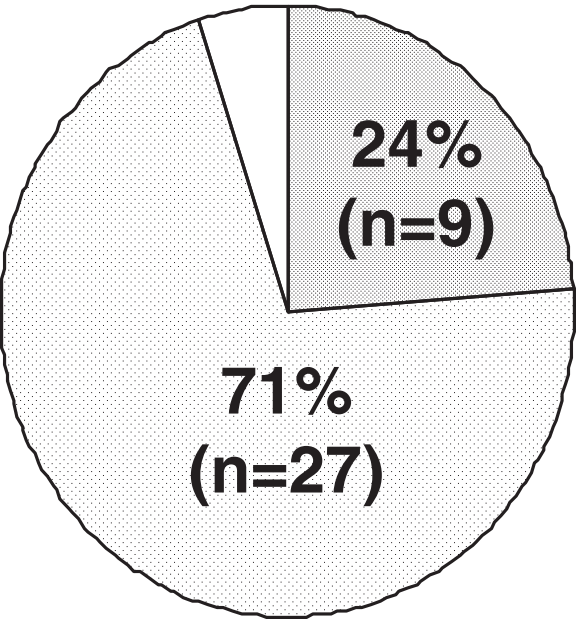

**24%**  
**(n=9)**

**71%**  
**(n=27)**

Supplement: MOESM5 [file 9513238]
